# Supplementary material
Source: PubMed Central journal article supplement (PMC2761686)
Supplement: NIHMS126531-supplement.pdf [file NIHMS126531-supplement.pdf]

## Supplemental Figures

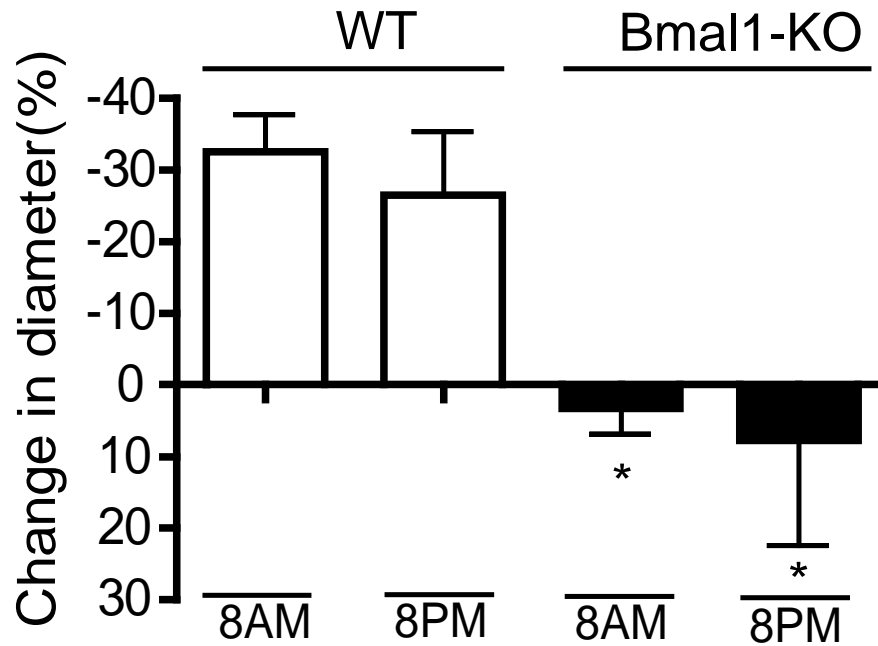

**Supplemental Figure 1. Aberrant vascular remodeling in mice with a dysfunctional biological clock.** Male Bmal1-KO and respective littermate wild-type controls (WT) (10-15 weeks of age) underwent LC ligation at indicated times of day. After 5 weeks, common carotid arteries were analyzed by histomorphometry. Inward remodeling was quantified as the percent change in LC diameter relative to RC. (N=5-7/group; \* $p < 0.05$  versus corresponding time).

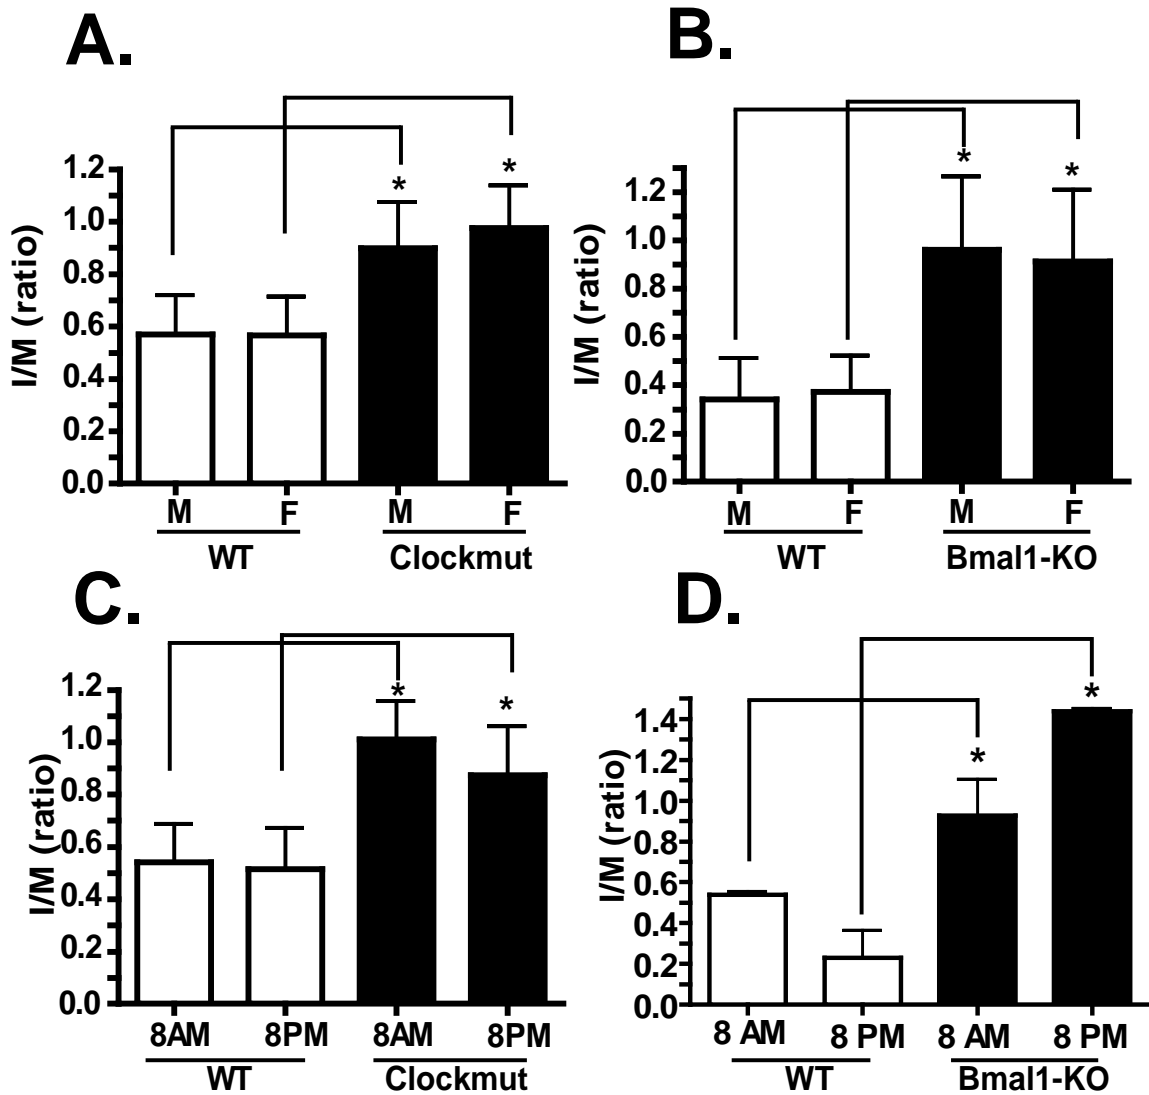

**Supplemental Figure 2. Increased vascular injury in Bmal1-KO and Clockmut mice.** Endovascular injury was performed in the left femoral artery of mice at indicated times. Intima to medial ratio (I/M) was quantified as an index of vascular injury. I/M ratio was increased in Clockmut and Bmal1-KO mice relative to wild-type controls, but was gender (A, B) and time independent (C, D). (N=6-10 per 5-7/group, \*p<0.05)

|                              | Wild-type     |               |               |               | Bmal1-KO                  |                |                            |               |
|------------------------------|---------------|---------------|---------------|---------------|---------------------------|----------------|----------------------------|---------------|
|                              | Male          |               | Females       |               | Males                     |                | Females                    |               |
|                              | young         | old           | young         | old           | young                     | old            | young                      | old           |
| <b>Body Weight (g)</b>       | 21.1±1.1 (14) | 24.2±1.9 (7)  | 17.2±0.7 (10) | 20.7±0.9(10)  | 16.1±1.1 * (11)           | 20.4±0.5 (4)   | 14.9±0.8 <sup>†</sup> (19) | 19.6±1.3 (6)  |
| <b>Triglycerides (mg/dL)</b> | 28.9±8.1 (6)  | 52.37±6.8 (9) | 43.0±10.1 (5) | 49.3±10.9 (7) | 126 ±20 * (6)             | 79.1±18.3 (5)  | 83.1±14.9 (14)             | 86.1±35.7 (6) |
| <b>Cholesterol (mg/dL)</b>   | 56.0±3.5 (6)  | 60.6±5.7 (9)  | 53.6±3.3 (5)  | 55.0±2.5 (7)  | 85.1±6.6 <sup>†</sup> (6) | 87.9±4.3 * (5) | 73.6±4.5 <sup>†</sup> (14) | 65.8±6.4 (6)  |

**Supplemental Table 1. Body weight and Lipid profiles in Bmal1-KO mice.** Plasma serum was isolated via the saphenous vein at a single time point (2 PM) and triglycerides and cholesterol were measured as previously described.<sup>40</sup> (N number is shown in parentheses, \* p<0.05 by one-way ANOVA versus corresponding WT age and gender control, <sup>†</sup>p<0.05 by unpaired t-test versus corresponding WT age and gender control)
